# Supplementary material
Source: Springer Nature journal article supplement (https://www.springermedizin.de/resource/supplementary/12882_2011_266_MOESM3_ESM.pdf/9453718)

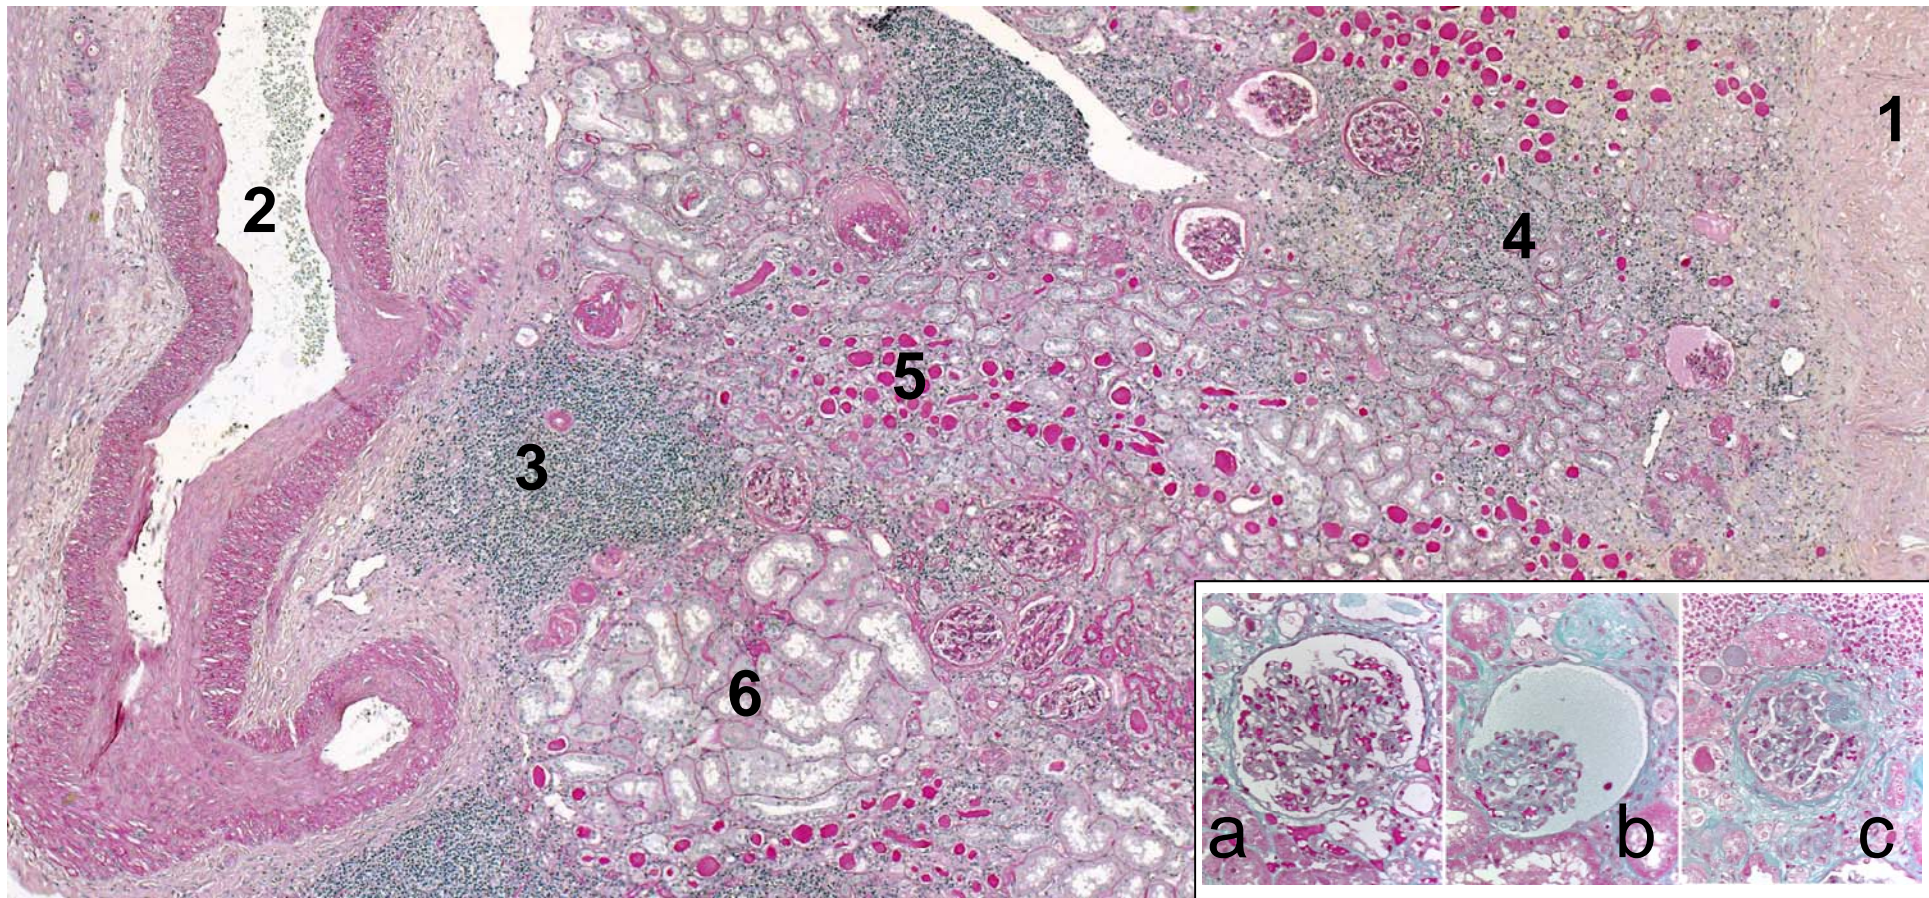

Supplement: MOESM3 [file 9453718]
